# Supplementary material for: Digital Gene Expression Analysis of Ponkan Mandarin (Citrus reticulata Blanco) in Response to Asia Citrus Psyllid-Vectored Huanglongbing Infection
Source: MDPI journal article supplement (doi:10.3390/ijms17071063), 2016-07-02
Supplement: s1 [file s1]

## Supplementary Materials: Digital Gene Expression Analysis of Ponkan Mandarin (*Citrus reticulata* Blanco) in Response to Asia Citrus Psyllid-Vectored Huanglongbing Infection

Yun Zhong, Chunzhen Cheng, Bo Jiang, Nonghui Jiang, Yongyan Zhang, Minlun Hu and Guangyan Zhong

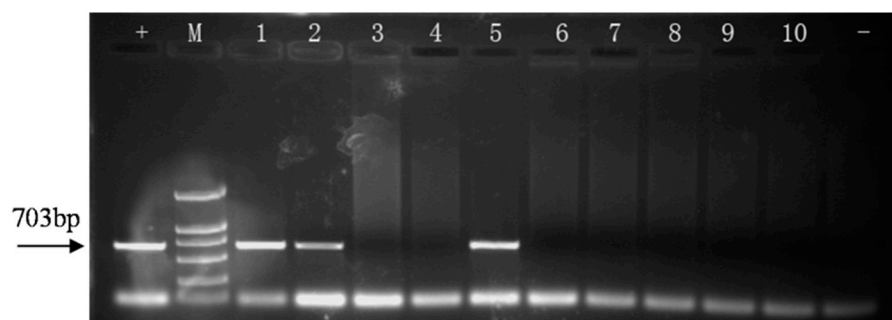

**Figure S1.** PCR detection for Citrus Huanglongbing (HLB) bacteria in leaves at 3 wpi. +: HLB positive control; -: HLB negative control; 1–5: ponkan seedlings exposed to CLas-carrying psyllids; 6–10: ponkan seedlings exposed to CLas-free psyllids; M, DNA ladder marker 2000; arrow located the amplification target.
